# Supplementary material for: Large-scale controlled synthesis of porous two-dimensional nanosheets for the hydrogen evolution reaction through a chemical pathway
Source: Royal Society of Chemistry journal article supplement (doi:10.1039/c8nr01182f), 2018-01-01
Supplement: c8nr01182f1.pdf [file c8nr01182f1.pdf]

## Electronic Supplementary Information

### **Large-scale Controlled Synthesis of Porous Two-dimensional Nanosheets for Hydrogen Evolution Reaction Through a Chemical Pathway**

Zheng Cui<sup>1</sup>, Hang Chu<sup>1</sup>, Shangpeng Gao<sup>2</sup>, Yu Pei<sup>1</sup>, Jin Ji<sup>1</sup>, Yuancai Ge<sup>1</sup>, Pei Dong<sup>3</sup>,  
Pulickel M. Ajayan<sup>3</sup>, Jianfeng Shen<sup>1\*</sup>, and Mingxin Ye<sup>1\*</sup>

<sup>1</sup> Institute of Special Materials and Technology, Fudan University, Shanghai, 200433,  
P. R. China

<sup>2</sup> Department of Materials Science, Fudan University, Shanghai, 200433, P. R. China

<sup>3</sup> Department of Materials Science and NanoEngineering, Rice University, 6100 Main  
Street, Houston, TX 77005, USA

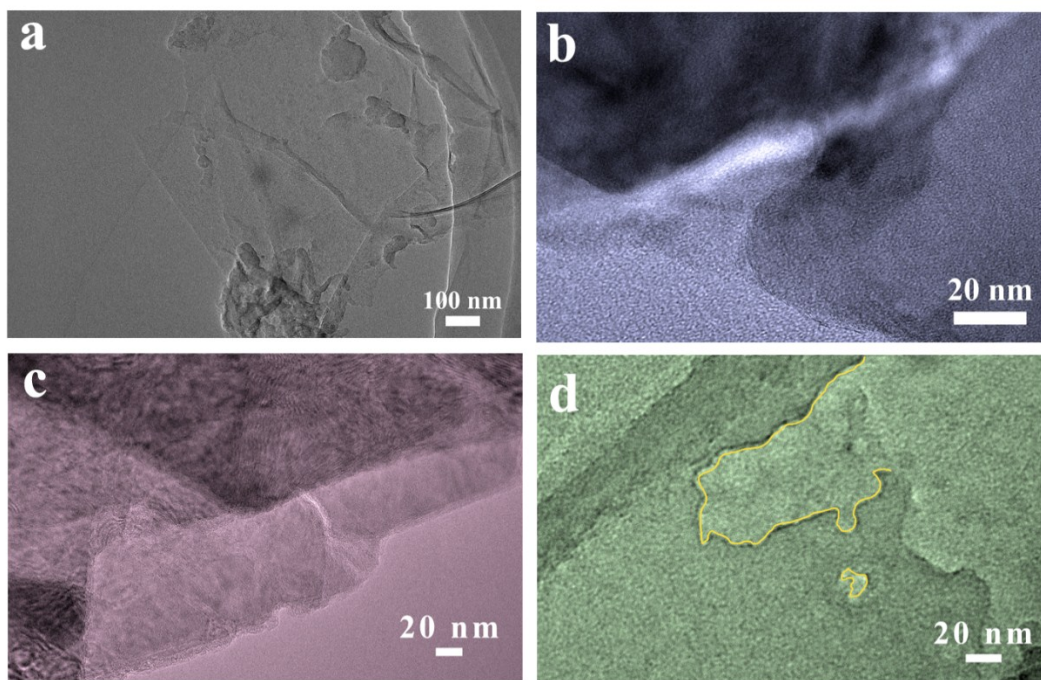

**Figure S1.** TEM images of a) MoS<sub>2</sub>-E; b) MKHE-1; c) MKHE-3; d) MKHE-5.

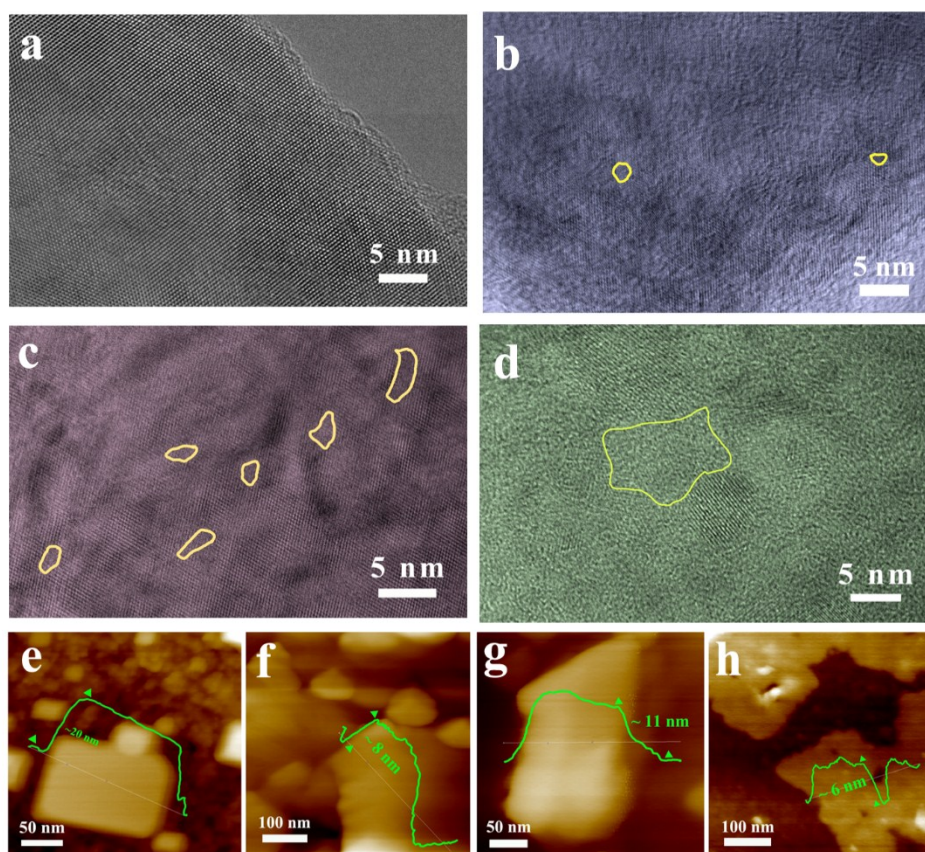

**Figure S2.** HR-TEM images of a) MoS<sub>2</sub>-E; b) MKHE-1; c) MKHE-3; d) MKHE-5;  
AFM images of e) MoS<sub>2</sub>-E, f) MKHE-1, g) MKHE-3, h) MKHE-5.

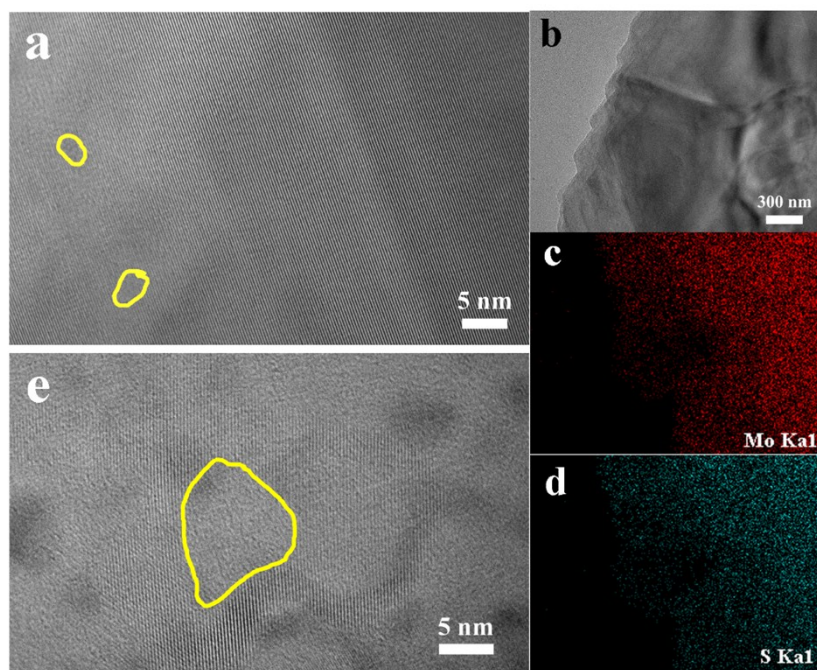

**Figure S3.** HR-TEM images of a) MKHE-2, e) MKHE-4; TEM images of b) MKHE-2; EDX-mapping of c, d) MKHE-2.

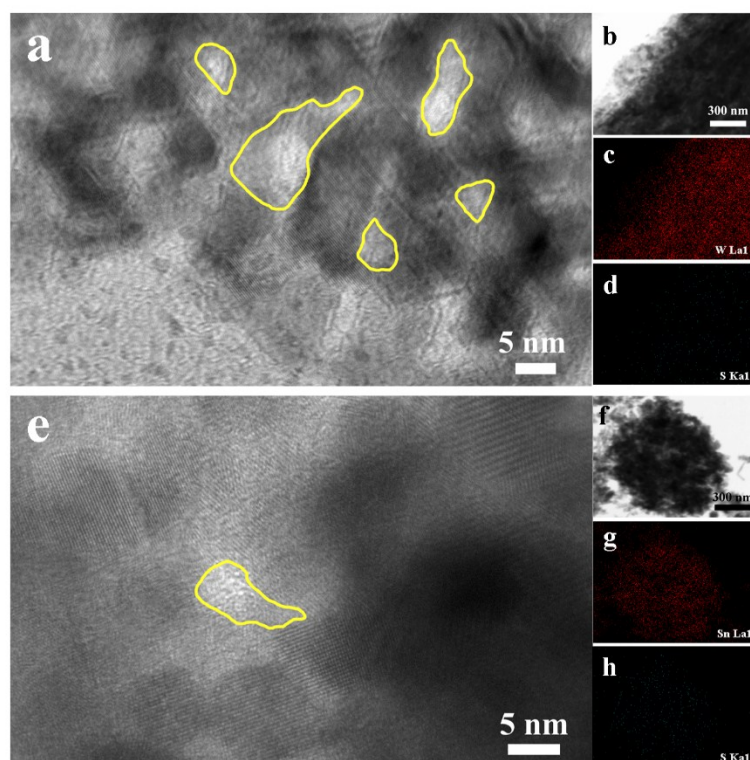

**Figure S4.** HR-TEM images of a) WKHE, e) SKHE; TEM images of b) WKHE, f) SKHE; EDX-mapping of c, d) WKHE, g, h) SKHE.



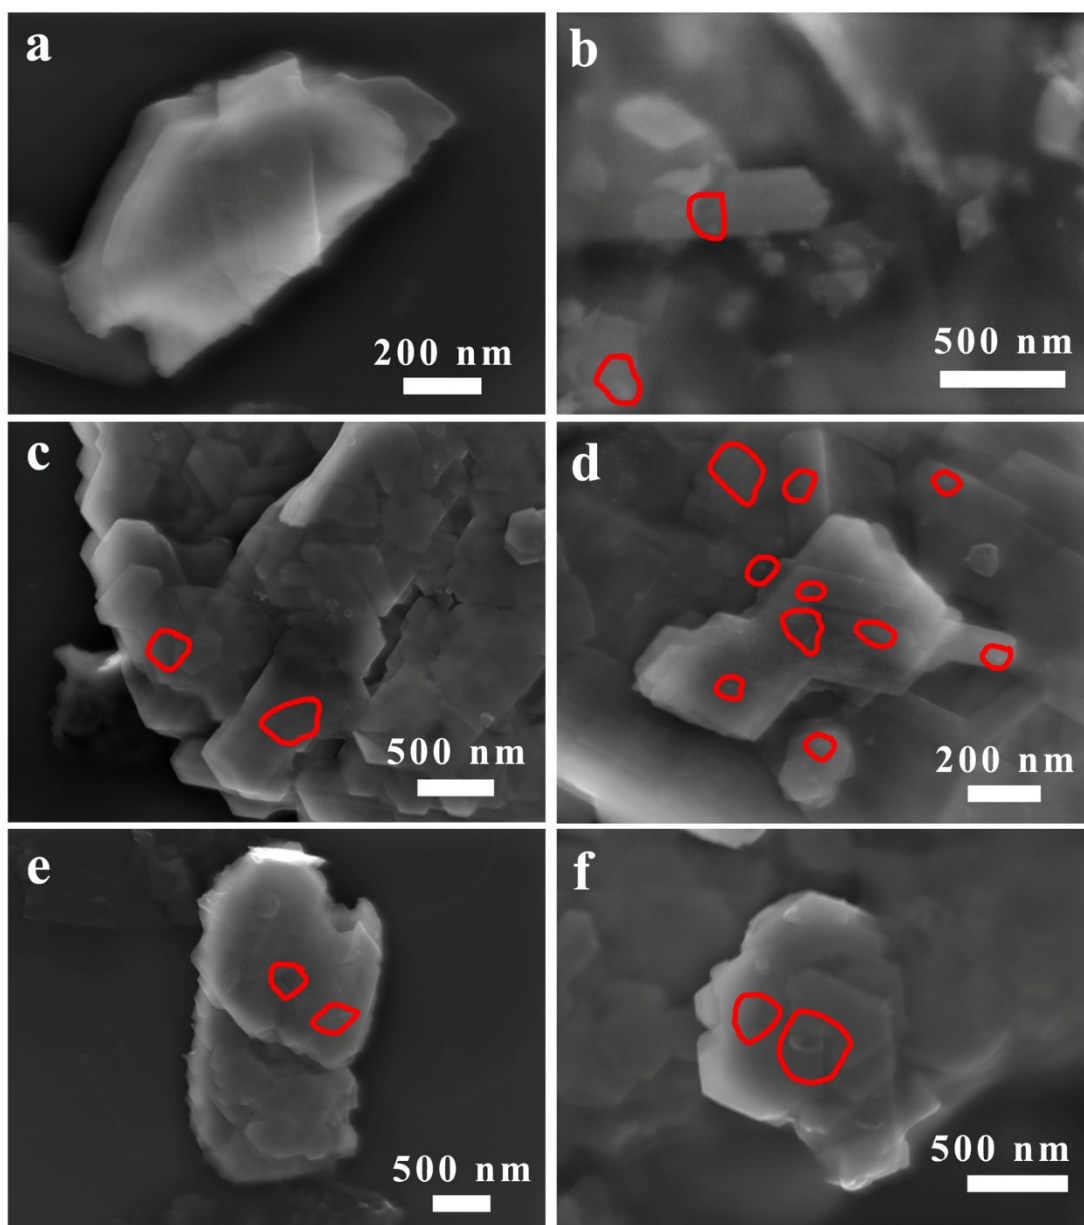

**Figure S5.** SEM images of a) MoS<sub>2</sub>-E; b) MKHE-1; c) MKHE-2; d) MKHE-3; e) MKHE-4 and f) MKHE-5.

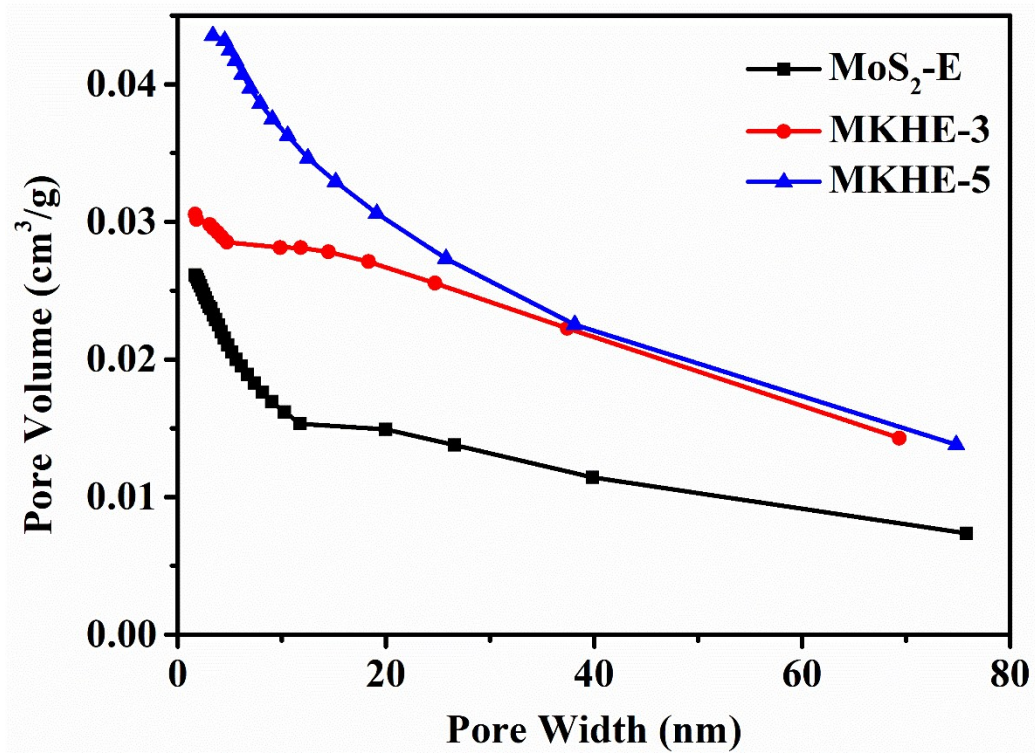

Figure S6. BJH Adsorption Cumulative Pore Volume of MoS<sub>2</sub>-E, MKHE-3 and MKHE-5.

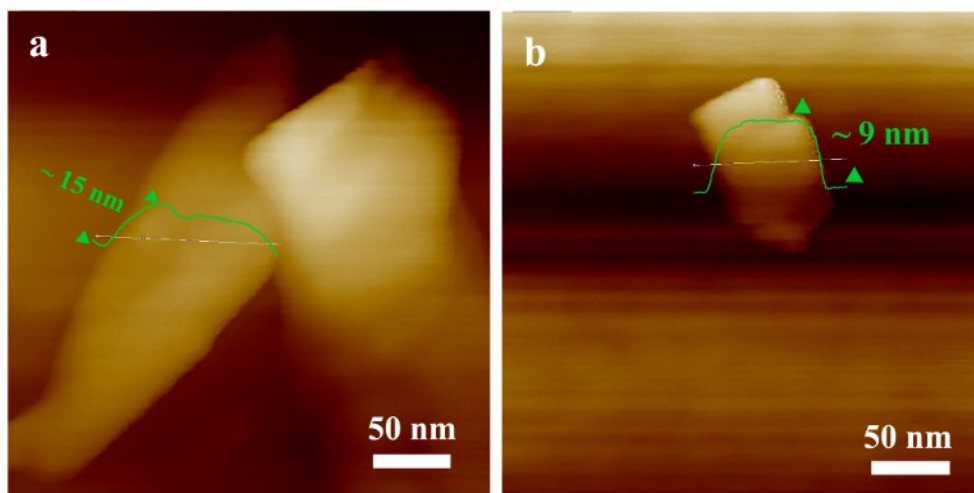

Figure S7. AFM images of a) WKHE, b) SKHE.

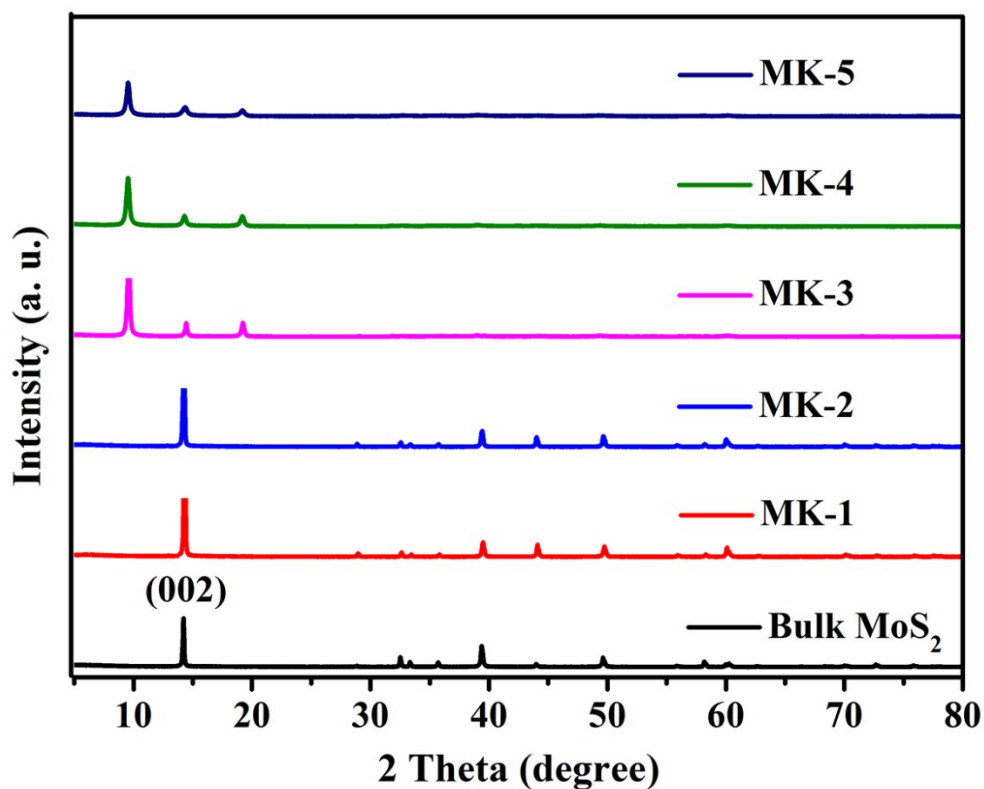

Figure S8. XRD patterns (enlarged edition) of bulk MoS<sub>2</sub>, MK-1, MK-2, MK-3, MK-4 and MK-5.

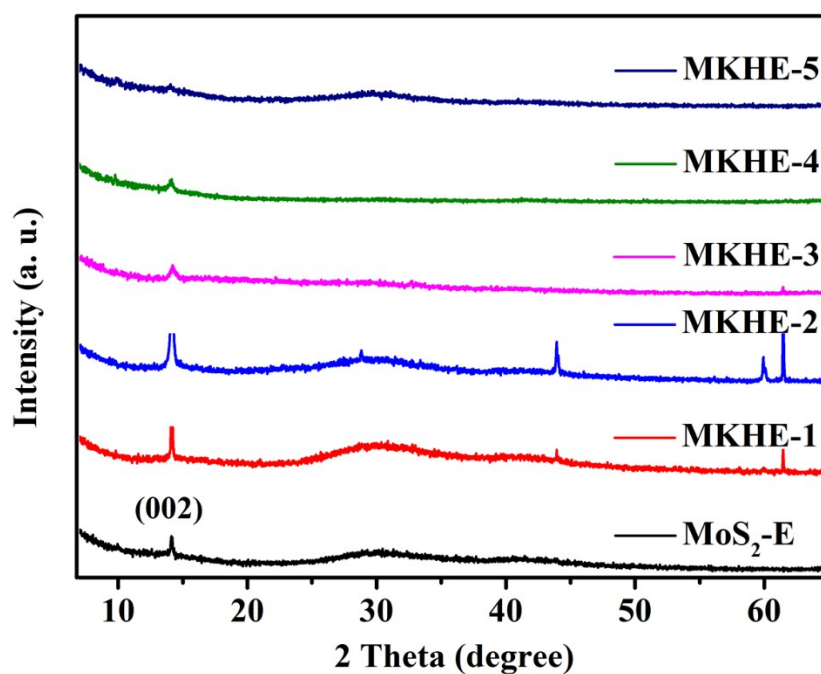

Figure S9. XRD patterns (enlarged edition) of MoS<sub>2</sub>-E, MKHE-1, MKHE-2, MKHE-3, MKHE-4 and MKHE-5.

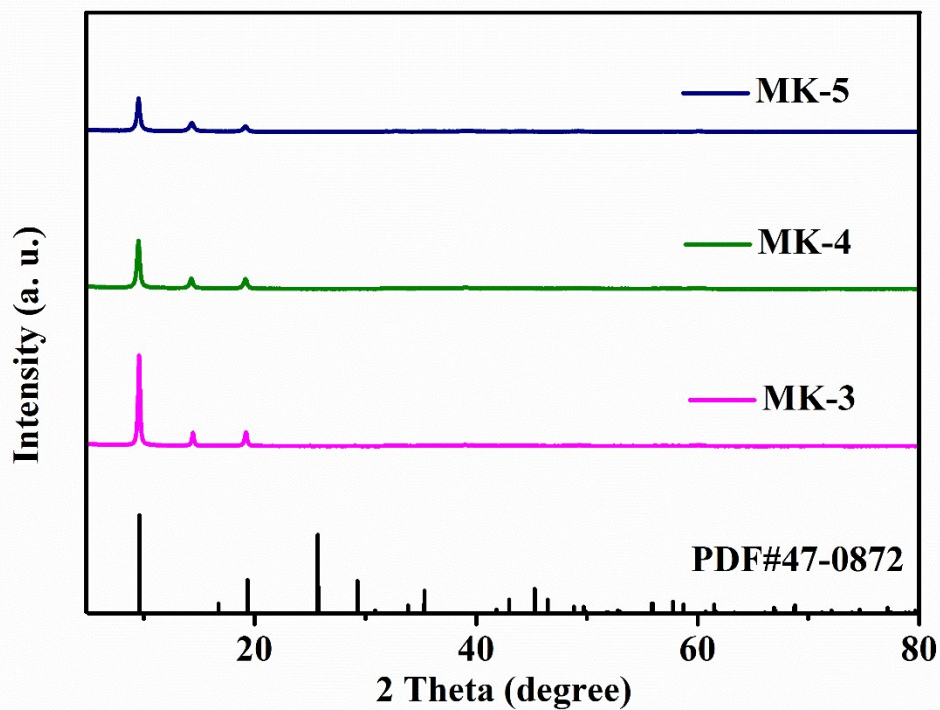

Figure S10. XRD patterns of MK-3, MK-4 and MK-5.

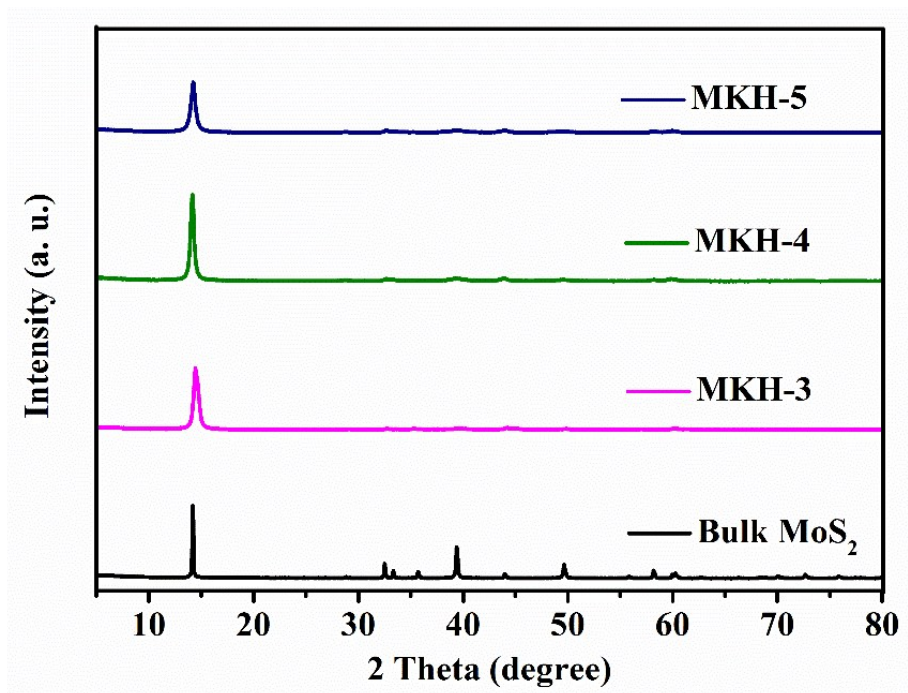

Figure S11. XRD patterns of bulk MoS<sub>2</sub>, MKH-3, MKH-4 and MKH-5.



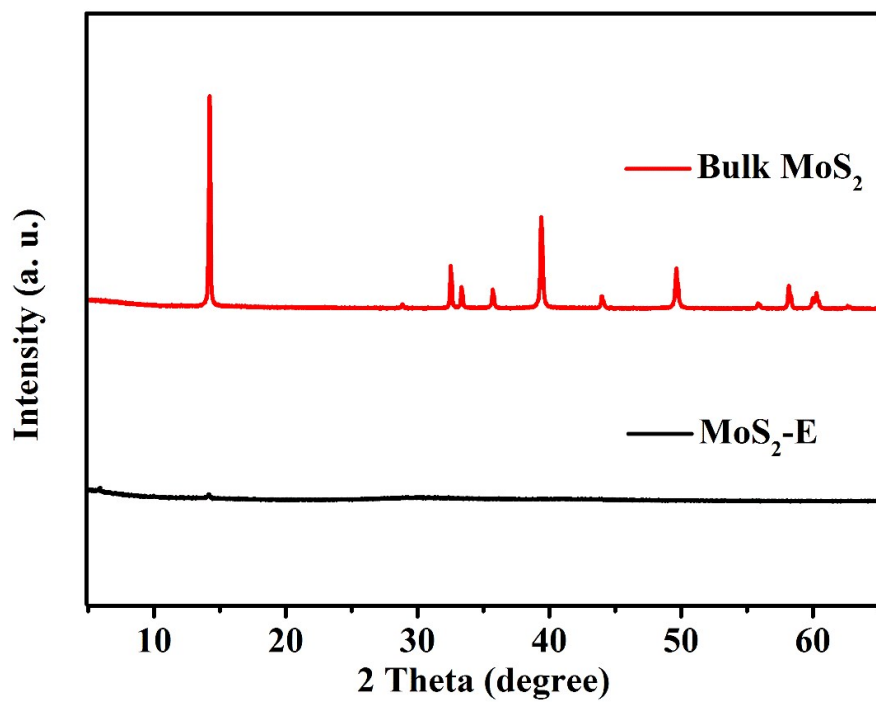

Figure S12. XRD patterns of MoS<sub>2</sub>-E and Bulk MoS<sub>2</sub>.

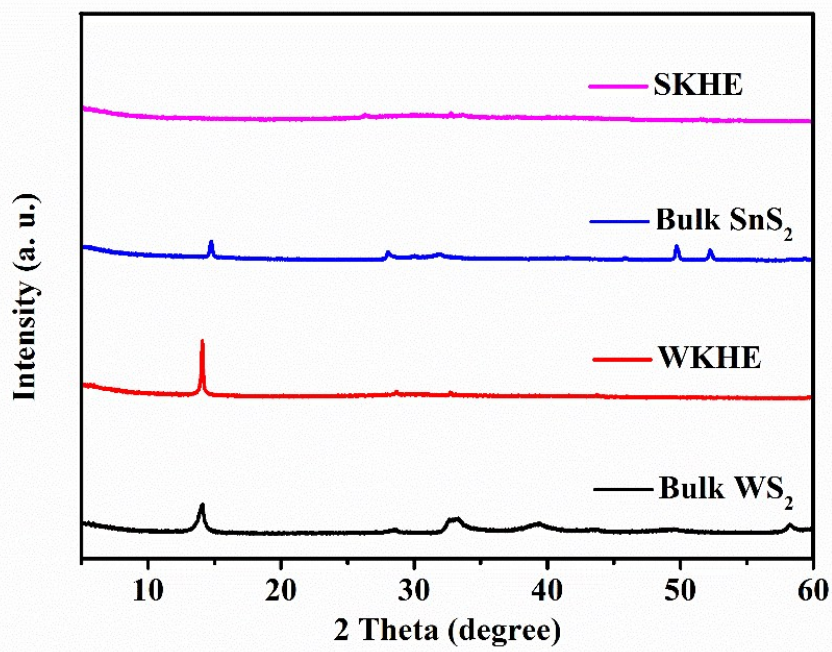

Figure S13. XRD patterns of bulk WS<sub>2</sub>, WKHE, Bulk SnS<sub>2</sub>, SKHE.



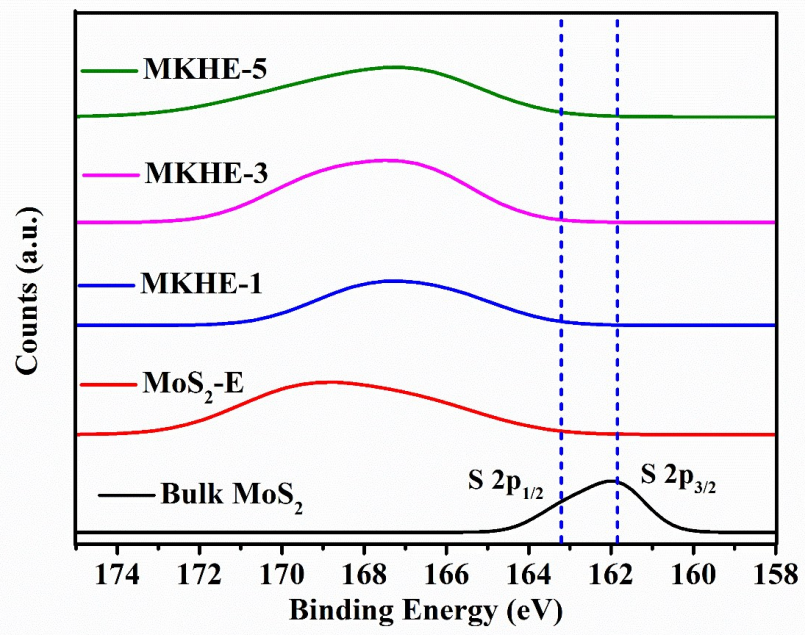

**Figure S14.** XPS spectra of the S 2p in bulk MoS<sub>2</sub>, MoS<sub>2</sub>-E, MKHE-1, MKHE-3, MKHE-5.

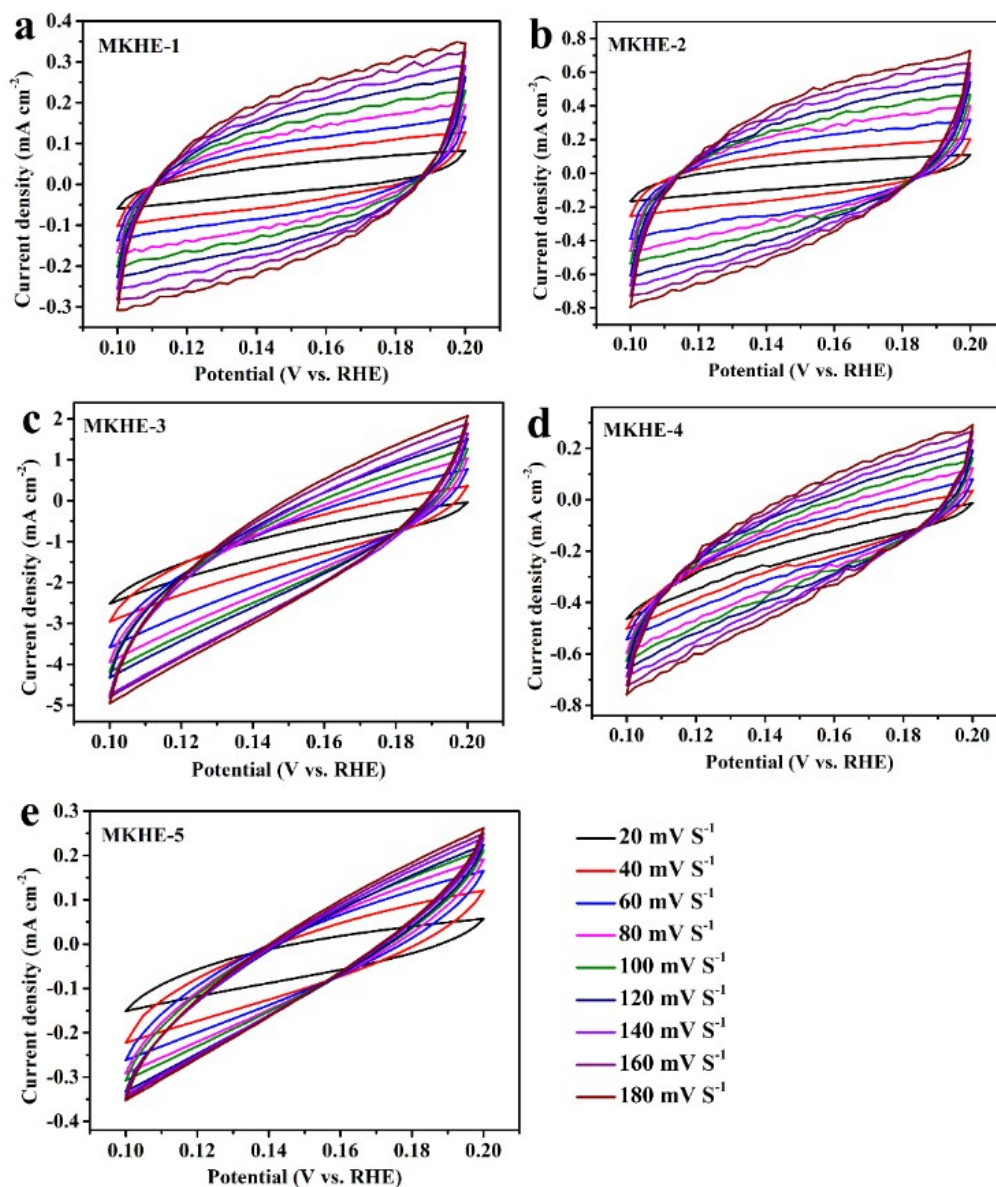

**Figure S15.** Cyclic voltammograms of the MKHEs under different scan rates, in the region of 0.1-0.2 V vs. RHE. These data were used to present the plots showing the extraction of the C<sub>dl</sub> for different MoS<sub>2</sub> samples shown in Figure 5c.

Table S1. Comparison of the Electrocatalytic Parameters for MKHE-3 with Various MoS<sub>2</sub> NS Samples in other papers

| Samples                            | $\eta$ (mV vs RHE) for<br>$j = -10 \text{ mA cm}^{-2}$ | Tafel slope<br>(mV dec <sup>-1</sup> ) | Cdl<br>(mF cm <sup>-2</sup> ) |
|------------------------------------|--------------------------------------------------------|----------------------------------------|-------------------------------|
| MKHE-3                             | 240.7                                                  | 88.4                                   | 6.45                          |
| Porous 2H-MoS <sub>2</sub>         | 218                                                    | 62                                     | 8.2                           |
| Functionalized 2H-MoS <sub>2</sub> | 343                                                    | 106                                    | 0.3 <sup>1</sup>              |
| sH-MoS <sub>2</sub>                | 262                                                    | 132                                    | 6.5 <sup>2</sup>              |
| Functionalized 2H-MoS <sub>2</sub> | 330                                                    | 136 <sup>3</sup>                       | -                             |
| Functionalized 2H-MoS <sub>2</sub> | 190                                                    | 160 <sup>4</sup>                       | -                             |
| 2H c-MoS <sub>2</sub>              | 309                                                    | 92                                     | 2.2 <sup>5</sup>              |

#### Notes and references

1. Yin, Y., Han, J., Zhang, Y., Zhang, X., Xu, P., Yuan, Q., Samad, L., Wang, X., Wang, Y. and Zhang, Z., *J AM CHEM SOC*, 2016, **138**, 7965.
2. Guo, B., Ke, Y., Li, H., Song, H., Zhang, Y., Xiang, L., Hao, F., Tan, Y. and Zhu, Z., *ACS APPL MATER INTER*, 2016, **8**, 5517.
3. Qi, D., Czech, K.J., Zhao, Y., Zhai, J., Hamers, R.J., Wright, J.C. and Song, J., *ACS APPL MATER INTER*, 2017, **9**, 12739.
4. Li, G., Du, Z., Qiao, Q., Yu, Y., Peterson, D., Zafar, A., Kumar, R., Curtarolo, S., Hunte, F. and Shannon, S., *J AM CHEM SOC*, 2016, **138**, 16632.
5. Chen, Y.C., Lu, A.Y., Lu, P., Yang, X., Jiang, C.M., Mariano, M., Kaehr, B., Lin, O., Taylor, A. and Sharp, I.D., *ADV MATER*, 2017, **29**, 6-7.
